## RESEARCH ARTICLE

## Is inadequate sleep a potential risk factor for periodontitis?

Ahmed A. Alhassani<sup>1</sup>\*, Mohammad S. Al-Zahrani<sup>1</sup>

Department of Periodontics, Faculty of Dentistry, King Abdulaziz University, Jeddah, Saudi Arabia

\* These authors contributed equally to this work.

\* [aalhassani@kau.edu.sa](mailto:aalhassani@kau.edu.sa), [msalzahrani@kau.edu.sa](mailto:msalzahrani@kau.edu.sa)

## Abstract

This study was undertaken to investigate the potential association between sleep duration and periodontitis. The study population consisted of 10,291 individuals who participated in the United States National Health and Nutrition Examination Survey (NHANES) from the 2009–2014 cycles. Sleep duration was categorized into sleep deficient (< 7 hours), sleep adequate (7–8 hours), and sleep excessive (> 8 hours). We used the Center for Disease Control and Prevention (CDC) and the American Academy of Periodontology (AAP) periodontitis case definition. Descriptive statistics and logistic regression models were used for data analyses. The prevalence of periodontitis was 36% higher in individuals who reported sleep deficiency when compared to the sleep adequate group (odds Ratio (OR) = 1.36, 95% confidence interval (CI): 1.23–1.50). Those who reported excessive sleep had 41% higher odds of periodontitis (OR: 1.40, 95% CI: 1.16–1.71). After adjusting for confounding factors, sleep deficient individuals were 19% more likely to have periodontitis when compared to sleep adequate individuals (OR: 1.19, 95% CI: 1.06–1.38). Among sleep excessive individuals, the association was non-significant (OR: 1.16, 95% CI: 0.94–1.43). Sleep deficiency was associated with a higher prevalence of periodontitis in this study population. The association however needs to be confirmed in longitudinal studies.

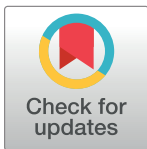

## OPEN ACCESS

**Citation:** Alhassani AA, Al-Zahrani MS (2020) Is inadequate sleep a potential risk factor for periodontitis? PLoS ONE 15(6): e0234487. <https://doi.org/10.1371/journal.pone.0234487>

**Editor:** Denis Bourgeois, University Lyon 1 Faculty of Dental Medicine, FRANCE

**Received:** December 9, 2019

**Accepted:** May 26, 2020

**Published:** June 16, 2020

**Copyright:** © 2020 Alhassani, Al-Zahrani. This is an open access article distributed under the terms of the [Creative Commons Attribution License](https://creativecommons.org/licenses/by/4.0/), which permits unrestricted use, distribution, and reproduction in any medium, provided the original author and source are credited.

**Data Availability Statement:** The data underlying the results presented in the study are available from (<https://www.cdc.gov/nchs/nhanes/Default.aspx>)

**Funding:** The authors received no specific funding for this work.

**Competing interests:** The authors have declared that no competing interests exist.

## Introduction

Periodontitis is one of the most frequent chronic conditions in human adults, affecting more than 42% of US adults 30 years of age or older [1]. It is a leading cause of tooth loss among adults and has been reported to have a harmful impact on general health and wellbeing [2–7]; periodontitis has been associated with diabetes, cardiovascular disease and adverse pregnancy outcomes [3–7]. It is a multifactorial disease that entails complex infectious and immunological interactions [8]. Although bacterial plaque biofilm is an essential factor in development of periodontitis, it is insufficient by itself to initiate the disease process. The interplay between the host response and the periodontopathic bacteria is the key to initiation and progression of periodontal inflammation. In a susceptible host, repeated bacterial insult results in dysregulation of the inflammatory and immune pathways leading to persistent inflammation and tissue destruction of the connective attachment, periodontal ligament and alveolar bone [9]. Several

environmental and systemic factors such as smoking, diabetes, stress and obesity have been linked to increased susceptibility to periodontitis [10].

Sleep is a natural physiologic process that has restorative and regulatory functions [11]. Sleep duration was found to have a U-shaped relationship with health outcomes. Sleep deficiency is frequently defined as having less than 6 or 7 hours of sleep, while sleep excess is defined as more than 8 or 9 hours [12]. Both deficient and excessive sleep durations are associated with poorer general health. Increased risk for all-cause mortality, diabetes, obesity, and coronary heart disease have been linked to both short and long sleep durations [12–16]. Sleep deprivation was also shown to impair function of the immune system, and could lead to metabolic and endocrine changes that mimic some of the hallmarks of ageing and obesity, which might explain the increase in the severity of age-related pathologies such as diabetes and hypertension [17–19]. Although insufficient nocturnal sleep has been reported to have a harmful impact on several body organs and systems, more than 30% of the American adults sleep less than the recommended 7 hours a night [20].

A few recent studies had investigated the association between sleep duration and periodontitis with conflicting results, reporting negative, positive and no associations between sleep duration and periodontitis [21–25]. These studies had major shortcomings in the classification of the exposure and/or the outcome. A number of them failed to appreciate the widely recognized non-linear (or U-shaped) relationship between sleep and health outcomes [12–16]. The purpose of this investigation therefore was to determine if there is a relation between sleep duration and periodontitis in a large nationally representative US sample.

## Methods

### Study population

We used data from the United States National Health and Nutrition Examination Survey (NHANES), 2009–2014 cycles. NHANES is a stratified multistage probability sample of the noninstitutionalized civilians living in United States' 50 states and District of Columbia [26]. In NHANES, calibrated examiners who were either registered dental hygienists or general dentists performed the periodontal examination in mobile examination centers for participants who were  $\geq 30$  years old ( $n = 14,556$ ). For all teeth except 3<sup>rd</sup> molars, probing depth (PD), and recession were recorded on six sites per tooth (mid-facial, mid-lingual, mesio-facial, mesio-lingual, disto-facial and disto-lingual). PD was recorded as the distance from the free gingival margin to the bottom of the sulcus/pocket. Recession was the distance between the free gingival margin and the cemento-enamel junction (CEJ). Recession was recorded as a negative value if the gingival margin was coronal to the CEJ. Readings were rounded to the nearest millimeter. Recession and PD measurement were summed to calculate the clinical attachment loss (CAL). Edentulous individuals and those with contributory medical history requiring prophylactic antibiotics were excluded from the periodontal examination. We also excluded participants if they had missing periodontal data, sleep data, or any of the covariates information, and performed a complete-case analysis. The final analysis included 10,291 participants.

### Definition of the exposure and the outcome

The main exposure was duration of sleep in hours based on the question how much sleep do you usually get at night on weekdays or workdays? Participants gave a range of 2–12 hours (12 was the maximum value, and was also given to those who reported more than 12 hours). We categorized sleep duration into 3 categories; 2–6 as sleep deficient, 7–8 as sleep adequate, and 9–12 as sleep excessive [27]. Self-reported sleep duration has been validated and used in the literature [28–30].

We used the case definition created by the Center for Disease Control and Prevention (CDC) and the American Academy of Periodontology (AAP) for periodontitis [31]. Periodontitis was defined as having at least 2 interproximal sites with 3 mm CAL or more and at least 2 interproximal sites with PD of 4 mm or more, that are not on the same tooth, or having at least 1 interproximal site with PD of 5 mm or more.

### Covariates

To control for confounding, we adjusted for major risk factors of periodontal disease; smoking, age, gender, race/ethnicity, education, socioeconomic level, diabetes and body mass index (BMI). In NHANES, race/ethnicity was classified as: non-Hispanic White, non-Hispanic Black, Mexican-American, other Hispanic, and other Race-including Multi-Racial. We categorized age into 30–34, 35–49, 50–64, and 65 y or older. For smoking, we used the following two questions: “smoked at least 100 cigarettes in life?” and “do you now smoke cigarettes?”, and categorized participants into: ‘current smoker’ if they answered yes to both questions, ‘former smoker’ if they answered yes to the first question but no to the second question, and never smokers if they answered no to both questions. We classified participants as diabetics if they answered yes to the question “have you ever been told by a doctor that you have diabetes?”. For socioeconomic level, we used the ratio of family income to poverty, and participants were categorized into <100, 100–199, 200–399, and  $\geq$ 400%, using the federal poverty level. We categorized BMI as follow: underweight (<18.5), healthy weight (18.5–24.9), overweight (25–29.9), and obese (30+ Kg/m<sup>2</sup>).

### Statistical analysis

Descriptive statistics for the study cohort by sleep categories were calculated. We used logistic regression models to calculate the odds of periodontitis comparing the sleep-deficient and the sleep excessive population to the sleep adequate participant (reference group). We adjusted the model for the confounding variables. We used the sample weights to account for the sampling design. Analysis was done using SAS statistical software (version 9.4; SAS Institute, Cary, NC).

### Results

The final analysis included 10,291 individuals, among whom 5,244 were periodontitis patients. [Table 1](#) shows characteristics of the study population by categories of sleep duration. Most of the study participants were either in the sleep adequate or sleep deficient categories. The number of women who reported sleeping more than 8 hours was slightly higher than men. Most of the less than 7 hours group were in the 35–49 y age range, while most of the more than 8 hours category were older. More proportion of non-Hispanic Black participants tended to report sleep deficiency, while most of the non-Hispanic White were either in the sleep adequate or excessive categories. Most of the current smokers reported less than 7 hours of sleep. The proportion of diabetics in the excessive sleep group was somewhat higher. Higher proportion of obese were sleep deficient. Most of participants who reported 7–8 hours were in the higher socioeconomic level. [Table 2](#) compared those with periodontitis to those with no periodontitis. About 42% of the study population had periodontitis. Periodontitis was higher among males, Mexican-American and non-Hispanic Black participants. Older individuals were more likely to have periodontitis. Never smokers were the least likely to have periodontitis, followed by former smokers; Current smokers had the highest risk. Diabetes and obesity were associated with a higher prevalence of periodontitis. Higher socioeconomic status and educational attainment were inversely associated with periodontitis. The average hours of sleep was marginally lower among participants with periodontal disease.

Table 1. Characteristics of the study population by sleep duration groups.

|                                           | 7–8 hours (adequate) |                 | < 7 hours (deficient) |                 | > 8 hours (excessive) |                 |
|-------------------------------------------|----------------------|-----------------|-----------------------|-----------------|-----------------------|-----------------|
|                                           | N                    | Weighted % (SE) | N                     | Weighted % (SE) | n                     | Weighted % (SE) |
| <b>Total</b>                              | 5523                 |                 | 4077                  |                 | 691                   |                 |
| <b>Gender</b>                             |                      |                 |                       |                 |                       |                 |
| Male                                      | 2714                 | 48.05 (0.81)    | 2047                  | 51.54 (1.07)    | 312                   | 42.00 (1.85)    |
| Female                                    | 2809                 | 51.95 (0.81)    | 2030                  | 48.46 (1.07)    | 379                   | 58.00 (1.85)    |
| <b>Age (years)</b>                        |                      |                 |                       |                 |                       |                 |
| 30–34                                     | 678                  | 11.88 (0.56)    | 516                   | 13.43 (0.68)    | 79                    | 12.44 (1.57)    |
| 35–49                                     | 1935                 | 36.44 (1.13)    | 1550                  | 42.44 (0.96)    | 167                   | 26.61 (2.40)    |
| 50–64                                     | 1678                 | 33.53 (1.05)    | 1322                  | 31.26 (1.21)    | 187                   | 27.62 (2.02)    |
| 65+                                       | 1232                 | 18.14 (0.76)    | 689                   | 12.86(0.56)     | 258                   | 33.34 (2.25)    |
| <b>Race/Ethnicity</b>                     |                      |                 |                       |                 |                       |                 |
| Mexican American                          | 819                  | 7.99 (1.12)     | 551                   | 8.32 (1.12)     | 93                    | 7.49 (1.43)     |
| Other Hispanic                            | 525                  | 4.98 (0.67)     | 459                   | 6.58 (0.92)     | 51                    | 3.87 (0.81)     |
| Non-Hispanic White                        | 2610                 | 72.59 (1.79)    | 1445                  | 60.83 (2.20)    | 368                   | 74.81 (2.44)    |
| Non-Hispanic Black                        | 872                  | 7.42 (0.64)     | 1129                  | 16.05 (1.36)    | 124                   | 8.95 (1.39)     |
| Other—including multi-racial              | 697                  | 7.02 (0.57)     | 493                   | 8.23 (0.74)     | 55                    | 4.88 (0.87)     |
| <b>Smoking</b>                            |                      |                 |                       |                 |                       |                 |
| Current smoker                            | 891                  | 14.08 (0.59)    | 919                   | 22.94 (0.91)    | 132                   | 17.88 (2.11)    |
| Former smoker                             | 1423                 | 27.11 (1.03)    | 939                   | 24.10 (0.96)    | 186                   | 26.75 (2.07)    |
| Never smoker                              | 3209                 | 58.82 (0.96)    | 2219                  | 52.97 (1.28)    | 373                   | 55.37 (2.16)    |
| <b>Diabetes</b>                           |                      |                 |                       |                 |                       |                 |
| No                                        | 4900                 | 91.25 (0.44)    | 3515                  | 89.24 (0.63)    | 563                   | 85.61 (1.68)    |
| Yes                                       | 623                  | 8.75 (0.44)     | 562                   | 10.77 (0.63)    | 128                   | 14.39 (1.68)    |
| <b>Body Mass Index (kg/m<sup>2</sup>)</b> |                      |                 |                       |                 |                       |                 |
| < 18.5                                    | 61                   | 0.95 (0.17)     | 40                    | 0.92 (0.19)     | 16                    | 2.13 (0.84)     |
| 18.5–24.9                                 | 1525                 | 27.62 (0.82)    | 960                   | 23.21 (1.05)    | 195                   | 29.46 (2.33)    |
| 25–29.9                                   | 1992                 | 36.78 (0.93)    | 1379                  | 34.20 (0.91)    | 213                   | 33.81 (2.40)    |
| 30+                                       | 1945                 | 34.65 (1.06)    | 1698                  | 41.68 (0.98)    | 267                   | 34.59 (2.30)    |
| <b>Socioeconomic level (% FPL)</b>        |                      |                 |                       |                 |                       |                 |
| < 100                                     | 1369                 | 16.20 (0.88)    | 1121                  | 20.30 (1.05)    | 201                   | 19.96 (2.01)    |
| 100–199                                   | 1233                 | 16.38 (0.80)    | 964                   | 19.27 (1.09)    | 173                   | 18.67 (1.66)    |
| 200–399                                   | 1321                 | 26.33 (1.21)    | 1004                  | 27.51 (1.24)    | 162                   | 26.60 (2.42)    |
| 400+                                      | 1600                 | 41.09 (1.52)    | 988                   | 32.91 (1.66)    | 155                   | 34.77 (3.04)    |
| <b>Education (years schooling)</b>        |                      |                 |                       |                 |                       |                 |
| < 12                                      | 1259                 | 14.19 (0.98)    | 954                   | 16.73 (0.85)    | 198                   | 18.17 (1.99)    |
| 12                                        | 1111                 | 19.20 (0.84)    | 948                   | 23.20 (0.99)    | 157                   | 20.61 (2.59)    |
| > 12                                      | 3153                 | 66.61 (1.41)    | 2175                  | 60.06 (1.25)    | 336                   | 61.22 (3.18)    |
| <b>Periodontitis</b>                      |                      |                 |                       |                 |                       |                 |
| No                                        | 2837                 | 61.22 (1.45)    | 1898                  | 53.80 (1.41)    | 312                   | 52.84 (3.05)    |
| Yes                                       | 2686                 | 38.78 (1.45)    | 2179                  | 46.20 (1.41)    | 379                   | 47.16 (3.05)    |

<https://doi.org/10.1371/journal.pone.0234487.t001>

In the crude model, those who slept less than 7 hours had a statistically significant 36% higher risk of periodontitis (OR: 1.36, 95% CI: 1.23–1.50) when compared to the 7–8 hours reference group, while the odds of periodontitis for participants who slept more than 8 hours were 40% higher than the reference group (OR: 1.40, 95% CI: 1.16–1.71) (Table 3). The association was slightly attenuated in the age adjusted model. In the fully adjusted model, the odds of periodontitis among the sleep-deficient population were 19% significantly higher than the

Table 2. Characteristics of the study population by periodontal disease diagnosis.

|                                           | No Periodontitis |                 | Periodontitis |                 |
|-------------------------------------------|------------------|-----------------|---------------|-----------------|
|                                           | N                | Weighted % (SE) | N             | Weighted % (SE) |
| <b>Total</b>                              | 5047             | 58.02 (1.38)    | 5244          | 41.99 (1.38)    |
| <b>Gender</b>                             |                  |                 |               |                 |
| Male                                      | 2021             | 42.25 (0.80)    | 3052          | 58.13 (0.71)    |
| Female                                    | 3026             | 57.75 (0.80)    | 2192          | 41.87 (0.71)    |
| <b>Age (years)</b>                        |                  |                 |               |                 |
| 30–34                                     | 885              | 16.08 (0.70)    | 388           | 7.49 (0.52)     |
| 35–49                                     | 2146             | 42.95 (1.03)    | 1506          | 31.09 (1.10)    |
| 50–64                                     | 1299             | 29.01 (1.02)    | 1888          | 36.93 (1.17)    |
| 65+                                       | 717              | 11.97 (0.60)    | 1462          | 24.49 (1.03)    |
| <b>Race/Ethnicity</b>                     |                  |                 |               |                 |
| Mexican American                          | 524              | 5.54 (0.72)     | 939           | 11.57 (1.70)    |
| Other Hispanic                            | 500              | 4.91 (0.62)     | 535           | 6.28 (0.91)     |
| Non-Hispanic White                        | 2532             | 74.79 (1.58)    | 1891          | 59.82 (2.56)    |
| Non-Hispanic Black                        | 830              | 7.92 (0.64)     | 1295          | 14.35 (1.40)    |
| Other—including multi-racial              | 661              | 6.84 (0.56)     | 584           | 7.98 (0.80)     |
| <b>Smoking</b>                            |                  |                 |               |                 |
| Current smoker                            | 643              | 11.57 (0.51)    | 1299          | 25.71 (0.79)    |
| Former smoker                             | 1136             | 24.28 (1.00)    | 1412          | 28.38 (1.05)    |
| Never smoker                              | 3268             | 64.15 (1.02)    | 2533          | 45.91 (1.00)    |
| <b>Diabetes</b>                           |                  |                 |               |                 |
| No                                        | 4616             | 93.16 (0.45)    | 4362          | 86.01 (0.60)    |
| Yes                                       | 431              | 6.84 (0.45)     | 882           | 13.99 (0.60)    |
| <b>Body Mass Index (kg/m<sup>2</sup>)</b> |                  |                 |               |                 |
| < 18.5                                    | 52               | 0.84 (0.17)     | 65            | 1.27 (0.18)     |
| 18.5–24.9                                 | 1388             | 27.60 (0.86)    | 1292          | 24.16 (0.79)    |
| 25–29.9                                   | 1747             | 35.90 (0.93)    | 1837          | 35.32 (0.72)    |
| 30+                                       | 1860             | 35.66 (0.87)    | 2050          | 39.25 (1.02)    |
| <b>Socioeconomic level (% FPL)</b>        |                  |                 |               |                 |
| < 100                                     | 1023             | 13.55 (0.80)    | 1668          | 23.95 (1.15)    |
| 100–199                                   | 972              | 14.20 (0.83)    | 1398          | 22.22 (0.91)    |
| 200–399                                   | 1237             | 25.52 (1.39)    | 1250          | 28.51 (1.14)    |
| 400+                                      | 1815             | 46.73 (1.79)    | 928           | 25.33 (1.18)    |
| <b>Education (years schooling)</b>        |                  |                 |               |                 |
| < 12                                      | 746              | 9.37 (0.75)     | 1665          | 23.64 (1.06)    |
| 12                                        | 906              | 16.99 (0.89)    | 1310          | 25.90 (0.71)    |
| > 12                                      | 3395             | 73.64 (1.23)    | 2269          | 50.46 (1.12)    |
| <b>Sleep</b>                              |                  |                 |               |                 |
| Average hours                             |                  | 6.93 (0.02)     |               | 6.82 (0.03)     |

<https://doi.org/10.1371/journal.pone.0234487.t002>

sleep-adequate participants (OR: 1.19, 95% CI: 1.06–1.38). The association among the sleep-excessive population was also attenuated and became statistically non-significant (OR: 1.16, 95% CI: 0.94–1.43).

## Discussion

The results of the present investigation showed that short sleep duration of 6 hours or less compared to sleeping the recommended 7–8 hours a night was associated with 19% increase in

**Table 3. Odd ratios and 95% CI relating duration of sleep to periodontitis.**

|                | 7–8 hours (adequate) | < 7 hours (deficient) | > 8 hours (excessive) | P-value |
|----------------|----------------------|-----------------------|-----------------------|---------|
| <b>Model 1</b> | 1.00 (ref)           | 1.36 (1.23–1.50)      | 1.41 (1.16–1.71)      | <0.001  |
| <b>Model 2</b> | 1.00 (ref)           | 1.49 (1.35–1.65)      | 1.26 (1.04–1.52)      | <0.001  |
| <b>Model 3</b> | 1.00 (ref)           | 1.19 (1.06–1.38)      | 1.16 (0.94–1.43)      | 0.01    |

Model 1: Crude

Model 2: Adjusted for age (30–34, 35–49, 50–64, 65+ y).

Model 3: Adjusted for age (30–34, 35–49, 50–64, 65+ y), gender (male, female), race/ethnicity (Mexican American, other Hispanic, non-Hispanic White, non-Hispanic Black, other-including multi-racial), smoking (current, former, never), diabetes (yes, no), BMI (< 18.5, 18.5–24.9, 25–29.9, 30+ kg/m<sup>2</sup>), socioeconomic level (< 100, 100–199, 200–399, 400+ % FPL), and education (< 12, 12, > 12 years of schooling).

<https://doi.org/10.1371/journal.pone.0234487.t003>

prevalence of periodontitis. These results are consistent with recent findings in a Turkish population in which sleep duration was found to be associated with the stage and grade of periodontitis [22]. It also supports the findings of a study that used the Taiwan National Health Insurance database and found a 36% increase in the probability of developing periodontitis among the study sample [25]. Our results are also in line with an animal study that found an increase of gingival inflammation and alveolar bone loss in sleep deprived rats. In contrast, our findings differ from results of a recent analysis by Romandini et al in which participants who slept 5 hours or less were less likely to have periodontitis [24]. The Romandini et al study used the community periodontal index (CPI) for periodontal assessment which has major limitations as it depends on few index teeth which might underestimate the prevalence of periodontitis. Furthermore, in that study, sleep duration was classified into 5 categories with the “less than 5 hours” as the reference category. This contrasts the majority of human sleep studies in which 7–8 hours, as was done in our study, were considered to be the adequate sleep duration. Lastly, the populations of the two studies are different which could explain in part the dissimilar findings.

Our findings also differ from a study by Wiener in which no significant association between sleep duration and periodontitis was found [23]. The sleep duration in Wiener’s study was dichotomized into less than 7 hours, and 7 hours or more which combine those with adequate (7–8 hours a night) and long (> 8 hour a night) sleep duration into a single category. This method of categorization fails to appreciate the U-shaped relationship between sleep and periodontitis. Long sleep duration of 9 hours or more has been shown, in several epidemiological studies to be related to an increased morbidity and mortality [32–34]. In addition, it was shown to be associated with a higher periodontitis prevalence among women and fewer remaining teeth among elderly [35, 36]. As long sleep duration might have harmful effect, combining adequate and long sleeper into a single category would probably dilute any significant results, which would explain the inconsistency in the results between the present study and Wiener’s results.

There are several plausible mechanisms to explain the observed association between short sleep duration and higher prevalence of periodontitis. Sleep is known to affect the immune system function; hence insufficient sleep could have altered the balance between the immune system and the periodontal microflora. Sleep deprivation has been linked to elevated level of pro-inflammatory cytokines that are important in regulating the inflammatory cascade such as interleukin-6 (IL-6), C-reactive protein (CRP), and tumor necrosis factor-alpha (TNF- $\alpha$ ) [37–39]. Pink et al prospectively investigated the association between systemic inflammation, using fibrinogen and white blood cell counts, and periodontal disease [40]. They found systemic inflammation to be a significant predictor of periodontal tissue loss [40]; thus activation of pro-inflammatory pathways is a possible mechanism by which short sleep duration could

affect periodontitis. In addition, sleep is linked to psychosocial stress and obesity which have been shown to be associated with higher periodontitis prevalence [41–43]. Since the present study was cross sectional, it could also be possible that insufficient sleep is a consequence rather than a cause of periodontitis or that the reported association between the two conditions is coincidental.

The present study has several strengths including the large representative sample size, the sophisticated sampling methods and application of the full-mouth clinical periodontal examinations protocol. Our study however has some limitations. Although research has shown that self-reported sleep duration has acceptable validity [28–30], bias due to measurement error cannot be ruled out. In addition, due to the observational nature of the study, the likelihood of confounding cannot be excluded. However, we adjusted for the established risk factors of periodontal disease which should mitigate any bias due to confounding. The cross-sectional design of our study is another limitation; Longitudinal cohort studies are warranted to confirm the findings of the present analysis, and to explore the potential causality.

In conclusion, findings of the present study showed an association between short sleep duration and higher prevalence of periodontitis in a nationally representative United States population. If these results were confirmed in longitudinal prospective studies, this might have significant health implications considering the high prevalence of periodontitis and increased number of individuals who sleep less than 7 hours, in the contemporary society.

## Supporting information

**S1 Table. STROBE statement—checklist of items that should be included in reports of observational studies.**  
(DOCX)

## Author Contributions

**Conceptualization:** Ahmed A. Alhassani, Mohammad S. Al-Zahrani.

**Data curation:** Ahmed A. Alhassani.

**Formal analysis:** Ahmed A. Alhassani, Mohammad S. Al-Zahrani.

**Investigation:** Ahmed A. Alhassani, Mohammad S. Al-Zahrani.

**Methodology:** Ahmed A. Alhassani, Mohammad S. Al-Zahrani.

**Project administration:** Mohammad S. Al-Zahrani.

**Resources:** Mohammad S. Al-Zahrani.

**Supervision:** Ahmed A. Alhassani.

**Validation:** Ahmed A. Alhassani, Mohammad S. Al-Zahrani.

**Visualization:** Ahmed A. Alhassani, Mohammad S. Al-Zahrani.

**Writing – original draft:** Mohammad S. Al-Zahrani.

**Writing – review & editing:** Ahmed A. Alhassani.

## References

1. Eke PI, Thornton-Evans GO, Wei L, Borgnakke WS, Dye BA, Genco RJ. Periodontitis in US Adults: National Health and Nutrition Examination Survey 2009–2014. *J Am Dent Assoc.* 2018; 149(7):576–88 e6. Epub 2018/06/30. <https://doi.org/10.1016/j.adaj.2018.04.023> PMID: 29957185.

2. Otomo-Corgel J, Pucher JJ, Rethman MP, Reynolds MA. State of the science: chronic periodontitis and systemic health. *The journal of evidence-based dental practice*. 2012; 12(3 Suppl):20–8. Epub 2012/10/17. [https://doi.org/10.1016/s1532-3382\(12\)70006-4](https://doi.org/10.1016/s1532-3382(12)70006-4) PMID: 23040337.
3. Khumaedi AI, Purnamasari D, Wijaya IP, Soeroso Y. The relationship of diabetes, periodontitis and cardiovascular disease. *Diabetes Metab Syndr*. 2019; 13(2):1675–8. Epub 2019/07/25. <https://doi.org/10.1016/j.dsx.2019.03.023> PMID: 31336540.
4. Papapanou PN. Systemic effects of periodontitis: lessons learned from research on atherosclerotic vascular disease and adverse pregnancy outcomes. *Int Dent J*. 2015; 65(6):283–91. Epub 2015/09/22. <https://doi.org/10.1111/idj.12185> PMID: 26388299; PubMed Central PMCID: PMC4713295.
5. Yu YH, Chasman DI, Buring JE, Rose L, Ridker PM. Cardiovascular risks associated with incident and prevalent periodontal disease. *J Clin Periodontol*. 2015; 42(1):21–8. Epub 2014/11/12. <https://doi.org/10.1111/jcpe.12335> PMID: 25385537; PubMed Central PMCID: PMC4300240.
6. Zhou X, Zhang W, Liu X, Zhang W, Li Y. Interrelationship between diabetes and periodontitis: role of hyperlipidemia. *Arch Oral Biol*. 2015; 60(4):667–74. Epub 2014/12/03. <https://doi.org/10.1016/j.archoralbio.2014.11.008> PMID: 25443979.
7. Sanz M, Marco Del Castillo A, Jepsen S, Gonzalez-Juanatey JR, D'Aiuto F, Bouchard P, et al. Periodontitis and cardiovascular diseases: Consensus report. *J Clin Periodontol*. 2020; 47(3):268–88. Epub 2020/02/06. <https://doi.org/10.1111/jcpe.13189> PMID: 32011025; PubMed Central PMCID: PMC7027895.
8. Slots J. Periodontitis: facts, fallacies and the future. *Periodontol 2000*. 2017; 75(1):7–23. Epub 2017/08/02. <https://doi.org/10.1111/prd.12221> PMID: 28758294.
9. Cekici A, Kantarci A, Hasturk H, Van Dyke TE. Inflammatory and immune pathways in the pathogenesis of periodontal disease. *Periodontol 2000*. 2014; 64(1):57–80. Epub 2013/12/11. <https://doi.org/10.1111/prd.12002> PMID: 24320956; PubMed Central PMCID: PMC4500791.
10. Albandar JM. Epidemiology and risk factors of periodontal diseases. *Dental clinics of North America*. 2005; 49(3):517–32, v-vi. Epub 2005/06/28. <https://doi.org/10.1016/j.cden.2005.03.003> PMID: 15978239.
11. Benington JH, Heller HC. Restoration of brain energy metabolism as the function of sleep. *Prog Neurobiol*. 1995; 45(4):347–60. Epub 1995/03/01. [https://doi.org/10.1016/0301-0082\(94\)00057-o](https://doi.org/10.1016/0301-0082(94)00057-o) PMID: 7624482.
12. da Silva AA, de Mello RG, Schaan CW, Fuchs FD, Redline S, Fuchs SC. Sleep duration and mortality in the elderly: a systematic review with meta-analysis. *BMJ Open*. 2016; 6(2):e008119. Epub 2016/02/19. <https://doi.org/10.1136/bmjopen-2015-008119> PMID: 26888725; PubMed Central PMCID: PMC4762152.
13. Covassin N, Singh P. Sleep Duration and Cardiovascular Disease Risk: Epidemiologic and Experimental Evidence. *Sleep Med Clin*. 2016; 11(1):81–9. Epub 2016/03/15. <https://doi.org/10.1016/j.jsmc.2015.10.007> PMID: 26972035; PubMed Central PMCID: PMC4791534.
14. Shan Z, Ma H, Xie M, Yan P, Guo Y, Bao W, et al. Sleep duration and risk of type 2 diabetes: a meta-analysis of prospective studies. *Diabetes Care*. 2015; 38(3):529–37. Epub 2015/02/26. <https://doi.org/10.2337/dc14-2073> PMID: 25715415.
15. Cappuccio FP, D'Elia L, Strazzullo P, Miller MA. Sleep duration and all-cause mortality: a systematic review and meta-analysis of prospective studies. *Sleep*. 2010; 33(5):585–92. Epub 2010/05/18. <https://doi.org/10.1093/sleep/33.5.585> PMID: 20469800; PubMed Central PMCID: PMC2864873.
16. Grandner MA, Schopfer EA, Sands-Lincoln M, Jackson N, Malhotra A. Relationship between sleep duration and body mass index depends on age. *Obesity (Silver Spring)*. 2015; 23(12):2491–8. Epub 2016/01/05. <https://doi.org/10.1002/oby.21247> PMID: 26727118; PubMed Central PMCID: PMC4700549.
17. Besedovsky L, Lange T, Born J. Sleep and immune function. *Pflugers Arch*. 2012; 463(1):121–37. Epub 2011/11/11. <https://doi.org/10.1007/s00424-011-1044-0> PMID: 22071480; PubMed Central PMCID: PMC3256323.
18. Spiegel K, Leproult R, Van Cauter E. Impact of sleep debt on metabolic and endocrine function. *Lancet*. 1999; 354(9188):1435–9. Epub 1999/10/30. [https://doi.org/10.1016/S0140-6736\(99\)01376-8](https://doi.org/10.1016/S0140-6736(99)01376-8) PMID: 10543671.
19. Spiegel K, Knutson K, Leproult R, Tasali E, Van Cauter E. Sleep loss: a novel risk factor for insulin resistance and Type 2 diabetes. *J Appl Physiol (1985)*. 2005; 99(5):2008–19. Epub 2005/10/18. <https://doi.org/10.1152/jappphysiol.00660.2005> PMID: 16227462.
20. Consensus Conference P, Watson NF, Badr MS, Belenky G, Bliwise DL, Buxton OM, et al. Joint Consensus Statement of the American Academy of Sleep Medicine and Sleep Research Society on the Recommended Amount of Sleep for a Healthy Adult: Methodology and Discussion. *Sleep*. 2015; 38



- (8):1161–83. Epub 2015/07/22. <https://doi.org/10.5665/sleep.4886> PMID: 26194576; PubMed Central PMCID: PMC4507722.
21. Grover V, Malhotra R, Kaur H. Exploring association between sleep deprivation and chronic periodontitis: A pilot study. *J Indian Soc Periodontol.* 2015; 19(3):304–7. Epub 2015/08/01. <https://doi.org/10.4103/0972-124X.154173> PMID: 26229272; PubMed Central PMCID: PMC4520116.
  22. Karaaslan F, Dikilitas A. The association between stage-grade of periodontitis and sleep quality and oral health-related quality of life. *J Periodontol.* 2019. Epub 2019/03/30. <https://doi.org/10.1002/JPER.19-0034> PMID: 30924153.
  23. Wiener RC. Relationship of Routine Inadequate Sleep Duration and Periodontitis in a Nationally Representative Sample. *Sleep Disord.* 2016; 2016:9158195. Epub 2016/02/24. <https://doi.org/10.1155/2016/9158195> PMID: 26904296; PubMed Central PMCID: PMC4745352.
  24. Romandini M, Gioco G, Perfetti G, Deli G, Staderini E, Lafori A. The association between periodontitis and sleep duration. *J Clin Periodontol.* 2017; 44(5):490–501. Epub 2017/02/18. <https://doi.org/10.1111/jcpe.12713> PMID: 28211083.
  25. Lee CF, Lin MC, Lin CL, Yen CM, Lin KY, Chang YJ, et al. Non-apnea sleep disorder increases the risk of periodontal disease: a retrospective population-based cohort study. *J Periodontol.* 2014; 85(4):e65–71. Epub 2013/09/26. <https://doi.org/10.1902/jop.2013.130284> PMID: 24059676.
  26. The Centers for Disease Control and Prevention (CDC) [Internet]. Available from: <https://www.cdc.gov/nchs/>.
  27. Hirshkowitz M, Whiton K, Albert SM, Alessi C, Bruni O, DonCarlos L, et al. National Sleep Foundation's sleep time duration recommendations: methodology and results summary. *Sleep Health.* 2015; 1(1):40–3. Epub 2015/03/01. <https://doi.org/10.1016/j.sleh.2014.12.010> PMID: 29073412.
  28. Lauderdale DS, Knutson KL, Yan LL, Liu K, Rathouz PJ. Self-reported and measured sleep duration: how similar are they? *Epidemiology (Cambridge, Mass.)*. 2008; 19(6):838–45. Epub 2008/10/16. <https://doi.org/10.1097/EDE.0b013e318187a7b0> PMID: 18854708; PubMed Central PMCID: PMC2785092.
  29. Cepeda MS, Stang P, Blacketer C, Kent JM, Wittenberg GM. Clinical Relevance of Sleep Duration: Results from a Cross-Sectional Analysis Using NHANES. *J Clin Sleep Med.* 2016; 12(6):813–9. Epub 2016/03/10. <https://doi.org/10.5664/jcsm.5876> PMID: 26951419; PubMed Central PMCID: PMC4877313.
  30. Cespedes EM, Hu FB, Redline S, Rosner B, Alcantara C, Cai J, et al. Comparison of Self-Reported Sleep Duration With Actigraphy: Results From the Hispanic Community Health Study/Study of Latinos Sueno Ancillary Study. *American journal of epidemiology.* 2016; 183(6):561–73. Epub 2016/03/05. <https://doi.org/10.1093/aje/kwv251> PMID: 26940117; PubMed Central PMCID: PMC4782764.
  31. Eke PI, Page RC, Wei L, Thornton-Evans G, Genco RJ. Update of the case definitions for population-based surveillance of periodontitis. *Journal of periodontology.* 2012; 83(12):1449–54. Epub 2012/03/17. <https://doi.org/10.1902/jop.2012.110664> PMID: 22420873; PubMed Central PMCID: PMC6005373.
  32. Tamakoshi A, Ohno Y, Group JS. Self-reported sleep duration as a predictor of all-cause mortality: results from the JACC study, Japan. *Sleep.* 2004; 27(1):51–4. Epub 2004/03/05. PMID: 14998237.
  33. Ferrie JE, Shipley MJ, Cappuccio FP, Brunner E, Miller MA, Kumari M, et al. A prospective study of change in sleep duration: associations with mortality in the Whitehall II cohort. *Sleep.* 2007; 30(12):1659–66. Epub 2008/02/06. <https://doi.org/10.1093/sleep/30.12.1659> PMID: 18246975; PubMed Central PMCID: PMC2276139.
  34. Hublin C, Partinen M, Koskenvuo M, Kaprio J. Sleep and mortality: a population-based 22-year follow-up study. *Sleep.* 2007; 30(10):1245–53. Epub 2007/11/01. <https://doi.org/10.1093/sleep/30.10.1245> PMID: 17969458; PubMed Central PMCID: PMC2266277.
  35. Han K, Park YM, Park JB. Evaluation of an association between long sleep duration and periodontal disease among men and women using nationally representative data. *Gac Sanit.* 2018; 32(2):143–50. Epub 2017/06/04. <https://doi.org/10.1016/j.gaceta.2017.01.013> PMID: 28576612.
  36. Koyama S, Aida J, Cable N, Tsuboya T, Matsuyama Y, Sato Y, et al. Sleep duration and remaining teeth among older people. *Sleep Med.* 2018; 52:18–22. Epub 2018/09/09. <https://doi.org/10.1016/j.sleep.2018.07.020> PMID: 30195198.
  37. Krysta K, Krzystanek M, Bratek A, Krupka-Matuszczyk I. Sleep and inflammatory markers in different psychiatric disorders. *J Neural Transm (Vienna)*. 2017; 124(Suppl 1):179–86. Epub 2015/12/10. <https://doi.org/10.1007/s00702-015-1492-3> PMID: 26649857; PubMed Central PMCID: PMC5281642.
  38. Meier-Ewert HK, Ridker PM, Rifai N, Regan MM, Price NJ, Dinges DF, et al. Effect of sleep loss on C-reactive protein, an inflammatory marker of cardiovascular risk. *J Am Coll Cardiol.* 2004; 43(4):678–83. Epub 2004/02/21. <https://doi.org/10.1016/j.jacc.2003.07.050> PMID: 14975482.
  39. Shearer WT, Reuben JM, Mullington JM, Price NJ, Lee BN, Smith EO, et al. Soluble TNF-alpha receptor 1 and IL-6 plasma levels in humans subjected to the sleep deprivation model of spaceflight. *J Allergy*

- Clin Immunol. 2001; 107(1):165–70. Epub 2001/01/10. <https://doi.org/10.1067/mai.2001.112270> PMID: 11150007.
40. Pink C, Kocher T, Meisel P, Dorr M, Markus MR, Jablonowski L, et al. Longitudinal effects of systemic inflammation markers on periodontitis. *Journal of clinical periodontology*. 2015; 42(11):988–97. Epub 2015/10/17. <https://doi.org/10.1111/jcpe.12473> PMID: 26472626.
  41. Hirotsu C, Tufik S, Andersen ML. Interactions between sleep, stress, and metabolism: From physiological to pathological conditions. *Sleep Sci*. 2015; 8(3):143–52. Epub 2016/01/19. <https://doi.org/10.1016/j.slsci.2015.09.002> PMID: 26779321; PubMed Central PMCID: PMC4688585.
  42. Coughlin JW, Smith MT. Sleep, obesity, and weight loss in adults: is there a rationale for providing sleep interventions in the treatment of obesity? *Int Rev Psychiatry*. 2014; 26(2):177–88. Epub 2014/06/04. <https://doi.org/10.3109/09540261.2014.911150> PMID: 24892893.
  43. Sabbah W, Gomaa N, Gireesh A. Stress, allostatic load, and periodontal diseases. *Periodontol 2000*. 2018; 78(1):154–61. Epub 2018/09/11. <https://doi.org/10.1111/prd.12238> PMID: 30198126.
